# Supplementary material for: Berberine Improves Chemo-Sensitivity to Cisplatin by Enhancing Cell Apoptosis and Repressing PI3K/AKT/mTOR Signaling Pathway in Gastric Cancer
Source: PubMed Central journal article supplement (PMC7756080; doi:10.3389/fphar.2020.616251), 2020-12-09

Beta-actin

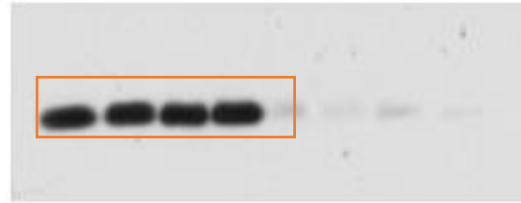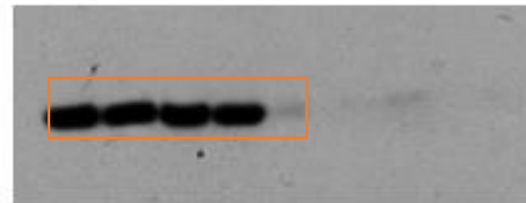

MRP1

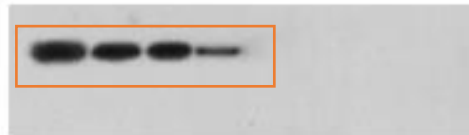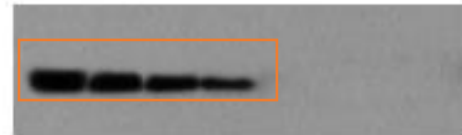

MDR1

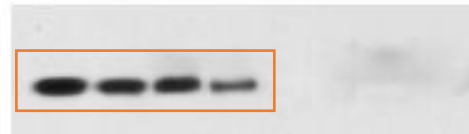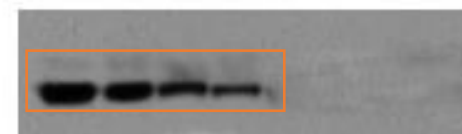

Figure 2C

Figure 2D

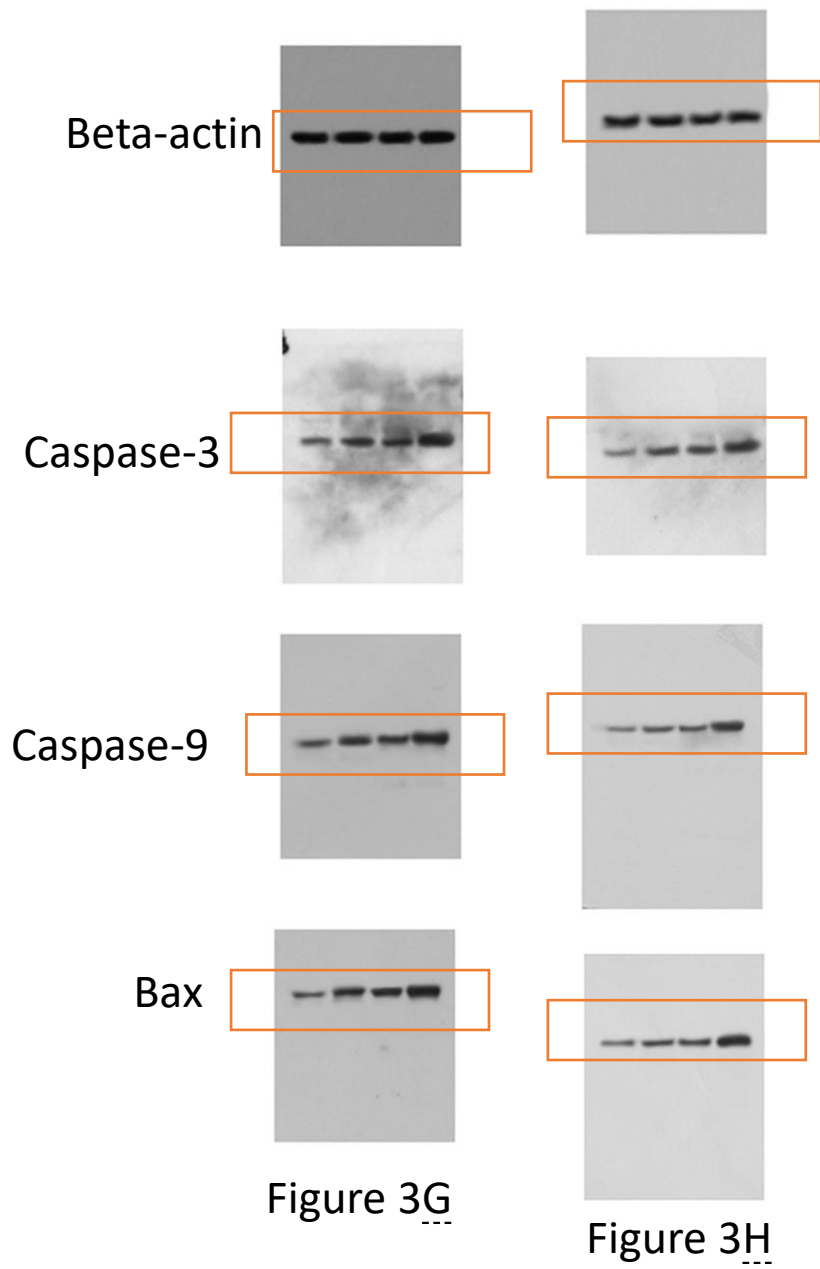

Figure 3G

Figure 3H

Figure 5A

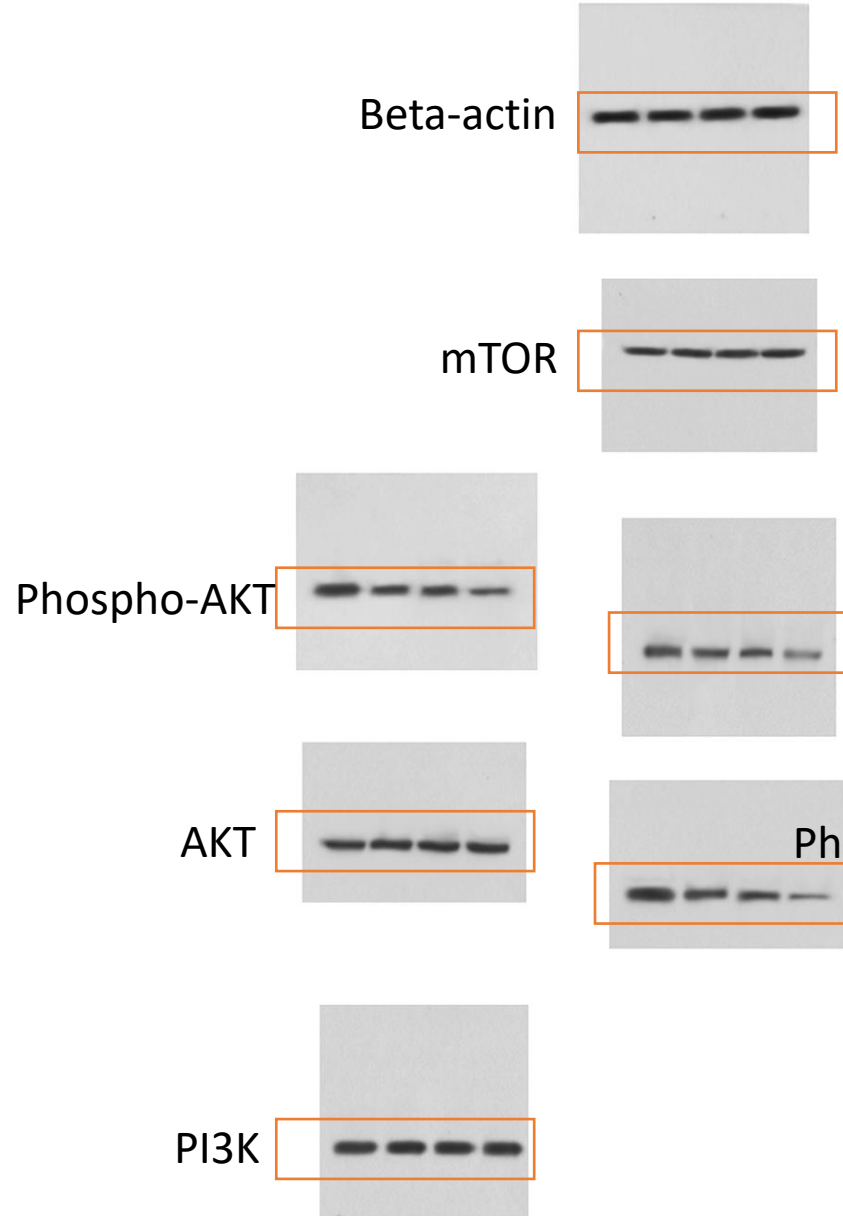

Figure 5B

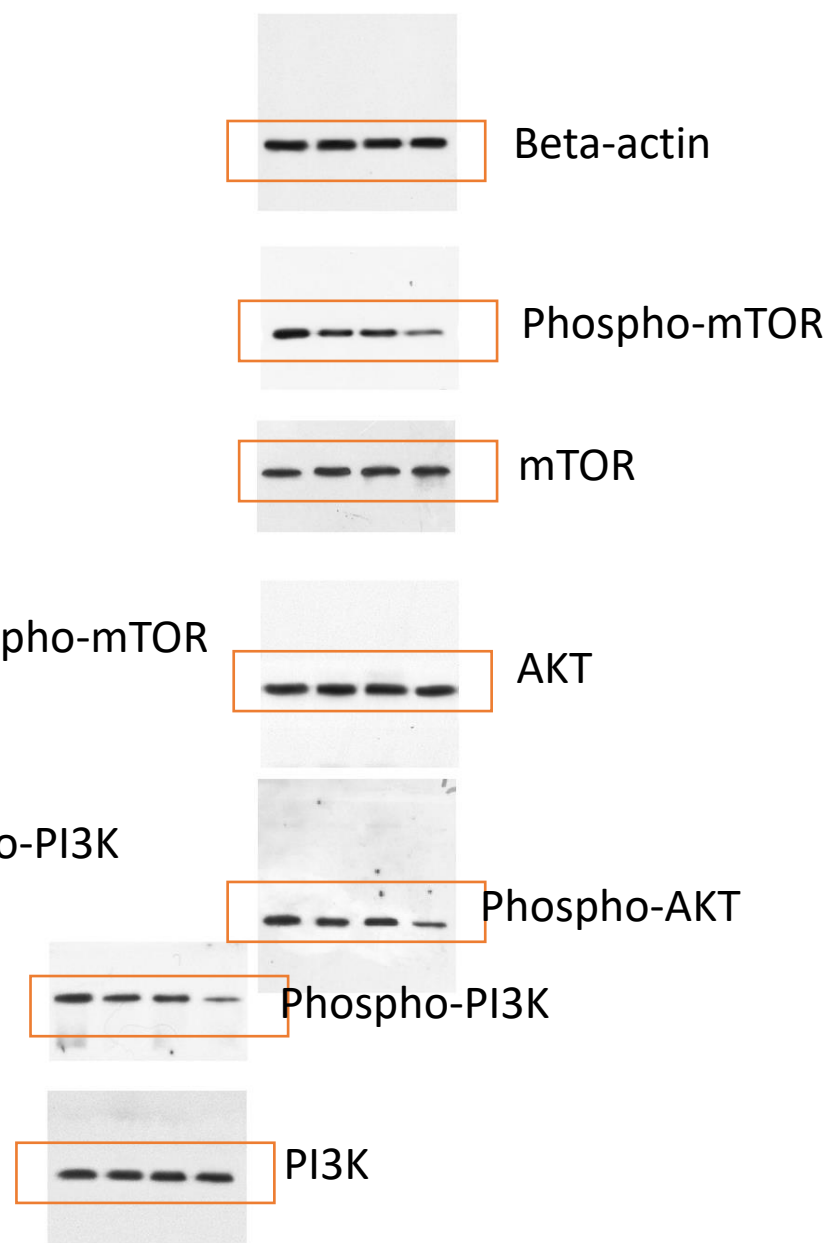

Supplement: datasheet1.pdf [file datasheet1.pdf]
